# Supplementary material for: Quantum chemistry study of the oxidation-induced stability and decomposition of propylene carbonate-containing complexes
Source: Royal Society of Chemistry journal article supplement (doi:10.1039/c3cp54728k), 2013-12-20
Supplement: c3cp54728k.pdf [file c3cp54728k.pdf]

## Supporting Information for

### Quantum Chemistry Study of the Oxidation-Induced Stability and Decomposition of Propylene Carbonate-Containing Clusters

Yating Wang<sup>1</sup>, Lidan Xing<sup>1,2,3\*</sup>, Oleg Borodin<sup>4</sup>, Wenna Huang<sup>1</sup>, Mengqing Xu<sup>1,2,3</sup>, Xiaoping Li<sup>1,2,3</sup>, Weishan Li<sup>1,2,3\*</sup>

1. School of Chemistry and Environment, South China Normal University, Guangzhou 510006, China

2. Key Laboratory of Electrochemical Technology on Energy Storage and Power Generation of Guangdong Higher Education Institutes, South China Normal University, Guangzhou 510006, China

3. Engineering Research Center of Materials and Technology for Electrochemical Energy Storage (Ministry of Education), South China Normal University, Guangzhou 510006, China

4. Electrochemistry Branch, Army Research Laboratory, 2800 Powder Mill Rd.; Adelphi, MD 20783

The oxidation potential of PC<sub>2</sub> has been calculated by using B3LYP and G4MP2 method respectively as is shown in Figure S1. It can be found the results from B3LYP are in good agreement with G4MP2.

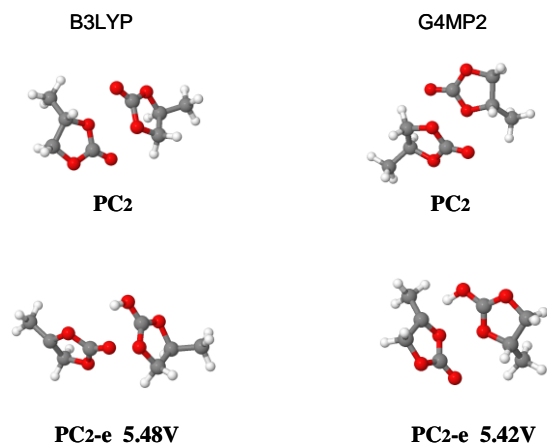

Figure S1. Optimized structures and calculated oxidation potentials (vs. Li/Li<sup>+</sup>) of PC<sub>2</sub>, using B3LYP/6-311++G(d) and G4MP2 method respectively.

---

\* Corresponding author.

Tel.: +86 20 39310256

fax: +86 20 39310256

E-mail address: xingld@sncu.edu.cn (L.D. Xing); liwsh@sncu.edu.cn (W.S. Li)
